# Supplementary material for: Enhancing catalysis studies with chat generative pre-trained transformer (ChatGPT): Conversation with ChatGPT
Source: Royal Society of Chemistry journal article supplement (doi:10.1039/d3dt04178f), 2024-01-01
Supplement: d3dt04178f1.pdf [file d3dt04178f1.pdf]

## *Supplementary Information*

### Enhancing catalysis studies with chat generative pre-trained transformer (ChatGPT): Conversation with ChatGPT

Navid Ansari,<sup>a</sup> Vahid Babaei,<sup>a</sup> and Mohammad Mahdi Najafpour<sup>b-d\*</sup>

<sup>a</sup>Max Planck Institute for Informatics Saarbrücken, Germany

<sup>b</sup>Department of Chemistry, Institute for Advanced Studies in Basic Sciences (IASBS), Zanjan, 45137-66731, Iran

<sup>c</sup>Center of Climate Change and Global Warming, Institute for Advanced Studies in Basic Sciences (IASBS), Zanjan, 45137-66731, Iran

<sup>d</sup>Research Center for Basic Sciences & Modern Technologies (RBST), Institute for Advanced Studies in Basic Sciences (IASBS), Zanjan, 45137-66731, Iran

\*E-mail: mmnajafpour@iasbs.ac.ir (MMN)

# Table of Contents

|                                                                                                           |            |
|-----------------------------------------------------------------------------------------------------------|------------|
| <b>Writing proposal .....</b>                                                                             | <b>S3</b>  |
| Write a proposal based on multi-technique characterization .....                                          | S3         |
| Now, we have the proposal. What is the next step? .....                                                   | S5         |
| Read the proposal again and select a good journal for the resulting manuscript.....                       | S7         |
| Write another proposal based on Material Modifications .....                                              | S9         |
| Another proposal based on material synthesis variations .....                                             | S11        |
| Another proposal on exploring Ni(IV) role .....                                                           | S13        |
| <b>Python code.....</b>                                                                                   | <b>S14</b> |
| Python code.....                                                                                          | S14        |
| <b>Ideas to improve other ideas .....</b>                                                                 | <b>S16</b> |
| Read ref. 1 and write ideas to improve the idea from the increasing in activity to study the details..... | S16        |
| Read ref. 2 and write ideas to improve the idea from the increasing activity to study the details.....    | S20        |
| Read ref. 3 and write ideas to improve the idea from the increasing activity to study the details.....    | S22        |
| <b>References.....</b>                                                                                    | <b>S24</b> |

## **Write a proposal based on multi-technique characterization**

*-Proposal*

*Title: Multi-technique Characterization of Advanced Materials for Comprehensive Structural and Morphological Analysis*

### *Introduction:*

*A wide range of materials drives the development and optimization of innovative technologies. To better understand these materials and their properties, multiple characterization techniques should be applied to uncover different aspects of their structures, morphologies, or electronic properties. Although Raman spectroscopy is a valuable tool, using a combination of characterization techniques, such as X-ray diffraction (XRD), Fourier-transform infrared spectroscopy (FTIR), and transmission electron microscopy (TEM), allows more accurate and detailed insights into material properties. This research proposal aims to establish a comprehensive characterization framework for advanced materials through the integration of multiple analytical techniques, optimizing their performance and enabling synergistic analysis.*

### *Objectives:*

*Develop a robust multi-technique analytical workflow for the comprehensive characterization of advanced materials.*

*Demonstrate the applicability and effectiveness of the proposed method across various material systems. Investigate correlations between different techniques and understand the advantages and limitations of synergistic characterization.*

### *Methodology:*

#### *Sample Preparation:*

- a. Select a variety of advanced materials, including catalysts, energy storage materials, and composites, to highlight the versatility and generality of the proposed method.*
- b. Prepare the material samples according to the needs of each characterization technique, including powder samples for XRD, thin sections for TEM, and thin films for FTIR and Raman spectroscopy.*

#### *Material Characterization:*

- a. Perform Raman spectroscopy to assess the vibrational properties of the samples and identify their crystal structures and electronic properties.*
- b. Conduct XRD to obtain information about crystal structures, phase composition, and lattice parameters.*
- c. Utilize FTIR for identifying functional groups and bonding patterns within the materials and for achieving complementary insights with Raman spectroscopy.*
- d. Employ TEM for the detailed morphological and structural study of the samples at nanoscale resolution.*

#### *Data Analysis and Integration:*

- a. Analyze and compare the results obtained from each characterization technique, emphasizing their complementarity and consistency.*
- b. Establish correlations between the structural and morphological features unveiled by the different techniques and develop a comprehensive understanding of the material properties.*
- c. Assess the practical considerations, limitations, and advantages of integrating multiple characterization techniques for each material system.*

#### *Expected Outcomes:*

*Generate a detailed and comprehensive understanding of material properties across various material systems using an integrated multi-technique characterization approach.*

*Establish the advantages and potential limitations of combined material characterization techniques, providing guidelines for future studies.*

*Elucidate materials' structural and morphological properties and their implications across diverse research areas and applications.*

*Timeline and Budget:*

*The project has an estimated duration of 24 months, with a proposed budget of \$300,000. This budget will cover sample preparation, access to analytical instruments, personnel salaries, data processing, and analysis software, as well as potential travel expenses for collaboration and conference presentations.*

*Conclusion:*

*The proposed study promises to establish a dynamic multi-technique characterization approach with the potential to deliver a robust understanding of advanced materials. The combination of Raman spectroscopy, XRD, FTIR, and TEM will provide comprehensive insights into materials' structural, morphological, and electronic properties, paving the way for more accurate, detailed, and reliable material analysis. These findings will have broad implications across a wide range of industries and applications, impacting the future development of novel materials and solutions.*

**Now, we have the proposal. What is the next step?**

*- Proposal Submission and Approval:*

*Submission*

*Prepare for Submission: Ensure that the proposal is in line with all guidelines provided by the institution or department*

*Documentation: Include all necessary documentation, like ethical approval forms or risk assessments.*

*Feedback: Be open to feedback, and be ready to make revisions as necessary.*

*Defense*

*Preparation: Prepare a presentation summarizing key aspects: problem statement, research question, methodology, expected outcomes, and significance.*

*Communication: Practice communicating your ideas clearly and confidently.*

*Q&A: Be ready to answer questions and defend your proposal's validity and significance.*

*Feedback and Revisions*

*Integration: Consider all feedback and revise your proposal accordingly.*

*Resubmission: Resubmit the refined proposal if necessary.*

*Ethical Approval*

*Compliance: Ensure all research activities comply with ethical guidelines.*

*Documentation: Properly document all ethical considerations and mitigations of potential issues.*

*2. Conducting the Research:*

*Data Collection*

*Follow Methodology: Stick to the detailed methodology in your proposal.*

*Record Keeping: Maintain detailed logs of your activities, challenges, and observations.*

*Data Analysis*

*Analytical Techniques: Apply appropriate statistical and analytical techniques.*

*Validation: Ensure your results are validated and reliable.*

*3. Regular Supervisory Meetings and Progress Reports:*

*Regular Meetings*

*Agenda: Have a clear agenda for each meeting.*

*Progress Showcase: Highlight what has been achieved and what's planned next.*

*Progress Reports*

*Structure: Ensure reports are well-structured, providing clear insights into your progress.*

*Challenges and Solutions: Discuss any obstacles and how you've addressed them.*

*4. Research Paper Drafting and Submission:*

*Drafting Papers*

*Structure: Ensure papers are structured correctly: introduction, methodology, results, discussion, conclusion, and references.*

*Clarity: Make sure your writing is clear, concise, and jargon-free wherever possible.*

*Communicate Findings*

*Conferences: Identify and attend conferences to share your findings.*

*Networking: Engage with peers and experts, seeking feedback and collaboration opportunities.*

*5. Thesis Writing:*

*Drafting*

*Consistency: Maintain a consistent writing style and structure throughout.*

*Content: Ensure all sections are robust and thoroughly developed.*

*Peer Review and Editing*

*Feedback: Seek feedback from peers and mentors.*

*Revisions: Revise and refine your thesis based on this feedback.*

*6. Thesis Submission and Viva Voce:*

## *Submission*

*Formatting: Check all formatting against institutional guidelines.*

*Documentation: Ensure all supplementary documents are included.*

## *Viva Preparation and Defense*

*Preparation: Be thoroughly familiar with your thesis and potential questions.*

*Defense: Defend your research rigorously, providing clear and confident responses.*

## *7. Post-Viva Adjustments:*

### *Make Corrections*

*Timeline: Ensure to make corrections within the stipulated time.*

*Acknowledgment: Acknowledge all feedback, even if you disagree, and address it appropriately.*

### *Final Submission*

*Documentation: Double-check that all documentation is correctly included.*

*Formats: Ensure that your thesis is submitted in any required formats.*

## *8. Graduation:*

*Completion: Ensure all institutional requirements are met for graduation.*

*Celebration: Take time to celebrate this significant achievement!*

## *9. Dissemination and Post-Doctoral Planning:*

### *Publish*

*Target Journals: Identify suitable journals and submit your research.*

*Peer Review: Be ready to address comments from reviewers.*

### *Post-Doctoral Path*

*Identify Opportunities: Look for post-doc positions, fellowships, or industry opportunities.*

*Application: Prepare tailored applications, showcasing your research and its relevance.*

### *Engage*

*Community Involvement: Stay involved in the academic community.*

*Collaborations: Explore potential collaborations and continue to build your network.*

### *Additional Tips:*

#### *Time Management:*

*Planning: Plan each phase meticulously and adhere to timelines.*

*Flexibility: Allow some flexibility for unexpected challenges or opportunities.*

#### *Wellbeing:*

*Balance: Ensure a balanced lifestyle, incorporating relaxation and social activities.*

*Support: Seek support networks, such as friends, family, and professionals.*

#### *Documentation:*

*Organized Records: Maintain systematic records of all activities and data.*

*Backups: Regularly back up all your work and data securely.*

#### *Compliance:*

*Institutional Guidelines: Adhere strictly to all institutional and departmental guidelines.*

*Ethical Compliance: Ensure all your research activities remain ethically compliant.*

*This is a generalized guide and might need adaptation based on specific institutional guidelines, field of study, and geographical location. Always ensure to adhere to the specific guidelines and protocols established by your institution or governing body.*

**Read the proposal again and select a good journal for the resulting manuscript**

1. "Materials Science and Engineering: R: Reports"

*Scope: This journal often deals with topics related to advanced materials characterization.*

*Note: Ensure the research has a review aspect since this journal often publishes review-type articles.*

2. "Advanced Materials"

*Scope: As a leading source in the field, it could be a prime outlet for groundbreaking research on material characterization.*

*Note: Highly competitive, ensure research findings are of significant impact.*

3. "Journal of Materials Chemistry A/B/C"

*Scope: It focuses on the applications, properties, and synthesis of exciting new materials.*

*Note: Select the appropriate subsection (A, B, or C) depending on the specific focus and application of your materials.*

4. "Materials Characterization"

*Scope: A specialized journal focusing on techniques for the characterization of materials.*

*Note: May be particularly suitable given the proposal's emphasis on multiple characterization techniques.*

5. "Acta Materialia" or "Scripta Materialia"

*Scope: Both are established journals in material science and engineering with a wide readership.*

*Note: Ensure the findings have broad implications or new insights into material science.*

6. "Applied Surface Science"

*Scope: Focuses on applied research on surfaces, interfaces, and nanostructures.*

*Note: Given the mention of nanoscale study in the proposal, this might be relevant.*

7. "Journal of Applied Physics"

*Scope: Broad-ranging, but includes a focus on applied material science and may be particularly interested in the properties of the materials you're characterizing.*

*Note: Emphasis on the significance of physical findings and their implications.*

8. "Analytical Chemistry"

*Scope: It has a broad scope but includes focus areas in materials characterization and analysis.*

*Note: Ensure the methods and analyses are deeply explored and validated in the research.*

9. "Physical Chemistry Chemical Physics (PCCP)"

*Scope: Interdisciplinary that looks at research in the interface between physics and chemistry.*

*Note: Suitable if your materials have interesting physical chemistry properties derived from your characterization techniques.*

10. "Journal of Physical Chemistry C"

markdown

Notes on Journal Selection:

*Impact Factor: Consider the impact factor of the journals. While it is not the only metric, it can give a sense of the journal's reach.*

*Audience: Ensure the journal reaches the audience you wish to communicate your findings to.*

*Open Access: Determine whether you wish to publish in an open-access format, and whether your budget allows it.*

*Acceptance Rate: Consider the competitiveness and the typical acceptance rate of the journal.*

*Peer Review: Understand the peer review process and time taken by each journal.*

*Remember to thoroughly review the "Aims and Scope" of each journal to ensure that your research fits well with what the journal publishes. Additionally, consider accessing resources like the Journal Citation Reports or the SCImago Journal Rank for further information about the impact and citation metrics of these journals.*

*Lastly, discuss with your supervisory team and colleagues about their experiences and recommendations for journals, as they can provide valuable insights.*



## Write another proposal based on Material Modifications

*-Title: Enhancing OER Catalytic Activity through Material Modification of Nickel (Hydr)oxide Catalysts*

### *Introduction:*

*Nickel (hydr)oxides are promising catalysts for the oxygen evolution reaction (OER), playing a significant role in energy conversion, notably in electrolysis and fuel cells. However, their practical application considerably depends on their catalytic activity and robustness. Doping or incorporating other metal ions into the nickel (hydr)oxide lattice can potentially improve activity and stability, opening new pathways for the fabrication of enhanced electrocatalysts. Our research aims to explore the effect of various metal ion doping agents on the catalytic performance of nickel (hydr)oxide for OER, with particular interest in energy production optimization.*

### *Objectives:*

*Investigate the effects of the inclusion of various metal ions as doping agents on the OER efficiency of nickel (hydr)oxide.*

*Explore correlations between different dopants, their concentrations, and the resulting OER catalytic activity.*

*Understand the fundamental effects of doping on the structural and electrochemical properties of nickel (hydr)oxide.*

### *Methodology:*

#### *Synthesis of Catalysts:*

- a. Develop a series of nickel (hydr)oxide catalysts doped with a variety of metal ions such as  $Fe^{3+}$ ,  $Co^{2+}$ ,  $Mn^{2+}$ , and  $Cu^{2+}$  using various techniques, including co-precipitation, sol-gel, and hydrothermal methods.*
- b. Systematically study the effect of the doping concentration on the electrocatalytic performance, synthesizing samples with different dopant concentrations.*

#### *Material Characterization:*

- a. Characterize the designed catalysts using X-ray diffraction (XRD), transmission electron microscopy (TEM), high-resolution electron microscopy (HRTEM), and X-ray photoelectron spectroscopy (XPS) to assess crystal structure, morphology, and elemental composition.*
- b. Conduct Fourier Transform Infrared Spectroscopy (FTIR) and Raman spectroscopy to evaluate possible changes in the structural and electronic properties of the catalysts induced by doping.*

#### *Electrochemical Analysis:*

- a. Evaluate the OER performance of the doped nickel (hydr)oxide catalysts using linear sweep voltammetry (LSV), obtaining current-potential curves in an alkaline electrolyte solution.*
- b. Perform cyclic voltammetry (CV), Tafel plots and electrochemical impedance spectroscopy (EIS) to get a comprehensive understanding of the mechanism of improved catalytic performance.*

#### *Data Analysis:*

- a. Compare and analyze the data from the characterization and electrochemical analysis to establish a relationship between dopant type/concentration and OER activity.*
- b. Conclude the effects of doping on the structural, electronic properties, and OER activity of nickel (hydr)oxide catalysts and make correlations.*

*Expected Outcomes:*

*Identify the optimal type and concentration of dopant for maximizing the OER performance of nickel (hydr)oxide.*

*Establish an understanding of the relationship between different doping agents and the catalytic activity of nickel (hydr)oxide catalysts.*

*Provide insights into catalyst design for further performance improvement of nickel (hydr)oxide in OER and other energy-related applications.*

*Timeline and Budget:*

*This project is envisioned for a period of 24 months with a proposed budget of \$250,000. This budget will account for the cost of materials, use of analytical instrumentation, personnel salaries, data management, and publication expenses.*

*Conclusion:*

*This research, focused on unveiling the effect of dopants on the catalytic performance of nickel (hydr)oxide catalysts, will crucially contribute to the advancement of OER catalyst design. Not only will it provide knowledge for catalyst enhancement but also it will guide the fabrication strategies for nickel (hydr)oxide and similar catalysts, ultimately advancing sustainable energy technologies.*

### **Another proposal based on material synthesis variations:**

*-Title: Investigating the Effects of Material Synthesis Variables on the OER Activity of Nickel Oxyhydroxide for Energy Applications*

#### *Introduction:*

*The increasing demand for the sustainable production of energy requires the development of efficient and cost-effective catalysts for the oxygen evolution reaction (OER). Nickel oxyhydroxide (NiOOH) has emerged as a promising catalyst for OER, owing to its low cost, availability, and excellent electrocatalytic properties. However, the influence of synthesis conditions on its performance remains elusive. This research proposal aims to systematically study the effects of various synthesis variables, such as temperature, pressure, and pH, on the electrocatalytic properties of NiOOH for OER application. The findings from this study will potentially contribute to the optimization of a scalable and efficient synthesis process for NiOOH-based catalysts, ultimately boosting renewable energy technologies.*

#### *Objectives:*

*Determine the optimal synthesis conditions for the production of high-performance NiOOH electrocatalysts for OER.*

*Investigate the correlations between synthesis variables and the physicochemical properties of NiOOH.*

*Elucidate the structure-performance relationship of NiOOH under different synthesis scenarios.*

#### *Methodology:*

##### *Synthesis of NiOOH samples:*

*a. NiOOH samples will be synthesized using various techniques, including chemical precipitation, hydrothermal synthesis, sol-gel, and microwave-assisted synthesis, to assess the impact of synthesis methods on OER activity.*

*b. For each synthesis method, experiments will be conducted under a range of parameters, including temperature (room temperature to 200°C), pressure (ambient to 20 atm), and pH (3 to 13).*

##### *Material characterization:*

*a. The synthesized samples will be characterized for their structural, morphological, and compositional properties using techniques such as X-ray diffraction (XRD), scanning electron microscopy (SEM), transmission electron microscopy (TEM), and X-ray photoelectron spectroscopy (XPS).*

*b. Specific surface area and porosity measurements will be carried out by the Brunauer-Emmett-Teller (BET) method.*

##### *Electrochemical testing:*

*a. OER activity of the NiOOH samples will be evaluated by linear sweep voltammetry (LSV), measuring the overpotential required to achieve a current density of 10 mA/cm<sup>2</sup> in alkaline electrolyte (e.g., 1 M KOH).*

*b. Additional electrochemical measurements, including cyclic voltammetry (CV), electrochemical impedance spectroscopy (EIS), and Tafel plots, will be conducted to further investigate the samples' catalytic behavior.*

##### *Data analysis:*

*a. Correlations between the material properties and OER activities of the samples will be established by comparing the electrochemical results and the characterization data.*

*b. Synthesis conditions that lead to optimal performance will be identified and further tested to validate the obtained trends.*

*Expected Outcomes:*

*Identify the most effective synthesis methods and conditions for obtaining NiOOH with an enhanced OER activity.*

*Provide a deeper understanding of the relationship between synthesis conditions, material properties, and OER activities in NiOOH-based catalysts.*

*Contribute to the improvement of scalable and efficient strategies for the fabrication of high-performance electrocatalysts for renewable energy applications.*

*Timeline and Budget:*

*The project is expected to last for 24 months with an estimated budget of \$200,000, which will cover the cost of materials, equipment, personnel, and miscellaneous expenses.*

*Conclusion:*

*The proposed study holds the potential to significantly improve the performance of NiOOH catalysts for the OER process through optimized material synthesis conditions. By identifying the critical parameters and relationships between synthesis conditions, material properties, and electrocatalytic performance, this research will significantly contribute to the development of affordable and efficient energy solutions to meet global energy demands.*

## **Another proposal on exploring Ni(IV) role**

*Title: Investigating the Role of Ni(IV) in Oxygen Evolution Reaction: Towards the Development of Efficient Catalysts*

### *Objective:*

*The primary objective of this Ph.D. research proposal is to investigate the role of Ni(IV) as a potential active state in the oxygen evolution reaction (OER), as suggested by recent studies. This research aims to gain deeper understanding of Ni(IV) catalysts' properties and mechanisms in OER, ultimately aiding in the development of more efficient and cost-effective catalysts for green energy applications.*

### *Background:*

*The oxygen evolution reaction (OER) constitutes a significant step in water electrolysis for hydrogen production and other energy conversion and storage technologies. The development of efficient catalysts for this reaction is crucial to enhance the overall performance and reduce the cost of these systems. Recently, studies have suggested the potential involvement of Ni(IV) as an active state in OER. This hypothesis necessitates a thorough exploration to corroborate its implications and reveal the properties of Ni(IV)-based catalysts.*

### *Research Questions:*

*What is the role of Ni(IV) in the oxygen evolution reaction mechanism?*

*How does the presence of Ni(IV) impact the OER catalytic activity and stability?*

*Can Ni(IV)-based catalysts be optimized to improve energy efficiency and reduce overall cost?*

### *Methods:*

*Synthesis of Ni(IV)-based catalysts: The student will synthesize various Ni(IV) catalyst structures by employing different preparation methods such as sol-gel, hydrothermal, and electrochemical deposition techniques.*

*Characterization: The student will utilize advanced characterization techniques like X-ray diffraction (XRD), transmission electron microscopy (TEM), X-ray photoelectron spectroscopy (XPS), and electron paramagnetic resonance (EPR) to determine the catalysts' crystal structure, morphology, composition, and electronic states.*

*Electrochemical evaluation: The student will perform electrochemical measurements, including linear sweep voltammetry, cyclic voltammetry, and impedance spectroscopy, to assess catalytic performance, reaction kinetics, and stability of the synthesized Ni(IV)-based catalysts.*

*Computational studies: The student will conduct density functional theory (DFT) calculations to provide insight into the OER mechanisms involving Ni(IV) centers.*

### *Expected Outcomes:*

*This research is expected to provide comprehensive knowledge about the role of Ni(IV) in the oxygen evolution reaction. By identifying key factors affecting the performance and stability of Ni(IV)-based catalysts, the findings will guide the development of improved, cost-effective catalysts for clean energy technologies.*

### *Timeline:*

*Year 1: Literature review, synthesis, and initial characterization of Ni(IV)-based catalyst candidates*

*Year 2: Detailed catalyst characterization, electrochemical evaluation, and optimization of catalysts*

*Year 3: Computational studies, examination of Ni(IV) OER mechanisms, and preparation of publications*

*Year 4: Thesis writing, final data analysis, and defense preparation*

### Python code

```
# Import libraries
import numpy as np
import matplotlib.pyplot as plt

# Define constants
k_e = 9e9 # Coulomb constant
C = 1e-6 # Constant factor for time
N = 101 # Number of bullets along each axis

# Create a grid of bullets with positive charges
grid = np.ones((N, N))

# Calculate the potential energy of each bullet
U = np.zeros((N, N))
for i in range(N):
    for j in range(N):
        for k in range(N):
            for l in range(N):
                if i != k or j != l: # Avoid self-interaction
                    U[i][j] += k_e / np.sqrt((i-k)**2 + (j-l)**2)

# Sort the bullets in descending order of potential energy
order = np.argsort(-U.flatten())
order = np.unravel_index(order, (N, N)) # Convert to 2D indices

# Initialize variables for simulation
E = np.sum(U) / 2 # Total energy
Q = N**2 # Total charge
t = 0 # Total time
E_list = [E] # List of energy values
t_list = [t] # List of time values

# Simulate the neutralization process
for i, j in zip(order[0], order[1]):
    # Neutralize the bullet
    grid[i][j] = 0
    # Update the energy
    E -= U[i][j]
    # Update the charge
    Q -= 1
    # Update the time
    n = np.sum(grid[i-1:i+2, j-1:j+2]) # Number of neighbors
    t += C / (n * Q)
    # Append to the lists
    E_list.append(E)
    t_list.append(t)
```

```
# Plot the curve of energy reduction over time
plt.plot(t_list, E_list)
plt.xlabel('Time (s)')
plt.ylabel('Energy (J)')
plt.title('Coulombic energy reduction over time')
plt.show()
```

**Read ref. 1 and write ideas to improve the idea from the increasing in activity to study the details.**

ChatGPT 4.0 wrote (in italics):

*To enhance the understanding and improve the activity of the iron-doped oxidized cobalt-nickel alloy as an OER electrocatalyst, several advanced investigative approaches and optimization strategies can be pursued:*

- 1. Nanostructuring and Surface Engineering: Investigating nanostructuring techniques to create more active sites on the catalyst surface could enhance its efficiency. Surface modifications, such as creating more porous structures or introducing specific functional groups, might also increase the electrocatalytic activity.*
- 2. Doping with Additional Metals or Non-metals: Experimenting with the addition of other metal or non-metal dopants (e.g., Mn, Mo, or S) could further improve catalytic performance. These elements might alter the electronic structure, enhancing the charge transfer kinetics and reducing the activation energy.*
- 3. Operando Characterization Techniques: Utilizing advanced operando spectroscopy methods like operando X-ray absorption spectroscopy (XAS) or operando Raman spectroscopy could provide real-time insights into the dynamic changes in oxidation states and the electronic structure of the catalyst during the OER process.*
- 4. Computational Modeling and Simulation: Employing density functional theory (DFT) calculations and molecular dynamics simulations could offer deeper insights into the atomic-level mechanisms, helping to optimize the composition and structure for enhanced performance.*
- 5. Electrolyte Optimization: Investigating the effect of different electrolyte compositions, pH levels, and ion concentrations could reveal optimal conditions for maximizing OER efficiency.*
- 6. Investigation of Interfacial Phenomena: A detailed study of the electrode/electrolyte interface could provide valuable information on how interfacial interactions and the electric double layer affect the OER kinetics.*
- 7. Stability and Durability Tests: Long-term stability and durability tests under realistic operating conditions are crucial. Techniques like accelerated stress tests could identify degradation mechanisms and guide the development of more robust catalysts.*



8. *Scale-up and Integration Studies: Exploring the scalability of the catalyst synthesis process and its integration into larger systems, like electrolyzers, could bridge the gap between laboratory-scale efficiency and industrial application.*
9. *Combining Experimental and Theoretical Approaches: Integrating experimental findings with theoretical models could lead to a more holistic understanding of the catalytic process, guiding the design of more efficient catalysts.*
10. *Synthesis of Hybrid Structures: Creating hybrid structures, where the iron-doped oxidized cobalt-nickel alloy is combined with other catalytically active materials or supports, might enhance the overall activity and stability.*
11. *Investigation of Synergistic Effects with Other Transition Metals: Beyond iron, exploring synergistic effects with other transition metals such as manganese or copper could provide further enhancement in catalytic activity. These metals may offer different electronic structures and thus contribute uniquely to the overall catalytic process.*
12. *Utilization of Advanced Synthesis Techniques: Employing techniques like atomic layer deposition or chemical vapor deposition could allow for more precise control over the doping process and the formation of the alloy. This might lead to a more uniform distribution of the active sites and potentially enhance the catalytic performance.*
13. *Surface Modification with Organic Molecules: Surface modification with organic molecules, such as polymers or self-assembled monolayers, could be explored to alter the surface properties, such as hydrophilicity or charge distribution, potentially enhancing the OER efficiency.*
14. *Electrocatalyst Support Modification: Investigating different support materials for the electrocatalyst, like carbon nanotubes, graphene, or conductive polymers, could improve electron transport and increase the overall efficiency of the catalytic process.*
15. *Photoelectrocatalytic Approaches: Combining the OER catalyst with a photocatalytic material could lead to a photoelectrocatalytic system. This approach could utilize solar energy to drive the OER, potentially reducing the overall energy requirement.*

16. *Probing Interfacial Charge Transfer Dynamics: Employing ultrafast spectroscopic techniques to study the charge transfer dynamics at the interface of the catalyst and the electrolyte. Understanding these dynamics could provide insights into the rate-limiting steps and how to overcome them.*
  
17. *Machine Learning Assisted Optimization: Using machine learning algorithms to analyze experimental data and predict optimal alloy compositions and processing conditions. This approach could significantly speed up the discovery of more efficient catalyst formulations.*
  
18. *Environmental and Durability Studies: Conducting long-term environmental impact and durability studies under various conditions to assess the practical viability and lifespan of the catalyst in real-world applications.*
  
19. *Investigation of Electrolyte Interactions: Studying the interaction of different electrolyte compositions with the catalyst surface at a molecular level, using techniques like neutron scattering or advanced microscopy, to understand how these interactions affect the OER process.*
  
20. *Scalable Synthesis Methods: Developing scalable synthesis methods for the catalyst that are cost-effective and environmentally benign, ensuring the feasibility of large-scale production and application.*

Sorry, but they are not new and could be found in other papers. please carefully think and say a really significant new idea

ChatGPT 4.0 wrote (*in italics*):

*Certainly, devising a truly novel approach in the field of electrocatalysis, especially for an iron-doped oxidized cobalt-nickel alloy as an OER electrocatalyst, requires stepping beyond conventional methodologies. Here's an innovative idea that integrates cutting-edge technologies and interdisciplinary approaches:*

*Development of Responsive Smart Electrocatalysts through Integration of Stimuli-Responsive Polymers:*

*Concept Overview: The idea is to coat or embed the iron-doped oxidized cobalt-nickel alloy catalyst with stimuli-responsive polymers. These polymers can change their physical or chemical properties in response to external stimuli such as pH, temperature, light, or electric fields. The integration of such polymers into*

*the electrocatalyst design could enable the dynamic tuning of the catalyst's activity and selectivity based on the operating conditions.*

*Stimuli-Responsive Mechanism: For instance, a polymer that contracts or expands in response to pH changes in the electrolyte could expose or cover active sites on the catalyst. This mechanism can be used to regulate the catalyst's activity and stability dynamically. For example, under optimal OER conditions, the polymer would expose active sites, but when conditions are suboptimal or during idle periods, the polymer could cover these sites, protecting them from degradation or sintering.*

*Photo-Responsive Polymers: Another approach could involve the use of light-responsive polymers. Under illumination with specific wavelengths of light, these polymers could alter their configuration, thereby modulating the catalyst surface characteristics (like wettability or electronic properties) to enhance the OER process efficiency.*

*Electro-Responsive Polymers: Incorporating electro-responsive polymers, which change their properties under different electric field strengths, could allow for the on-demand modulation of catalytic activity. This could be particularly useful in systems where the power supply is variable, like in renewable energy systems.*

*Integrated Sensing and Catalytic Activity: Embedding sensors within the catalyst structure to monitor real-time changes in the electrochemical environment (like pH, temperature, or concentration of reactants/products) and using this data to actively control the polymer response. This creates a feedback loop where the catalyst can adapt its behavior based on the immediate operational conditions.*

*Enhanced Durability and Selectivity: By protecting the active sites during non-optimal conditions, this approach could significantly enhance the durability of the catalyst. Additionally, the selective exposure of active sites could improve the selectivity of the OER process, potentially opening pathways to new electrochemical reactions.*

*Fabrication and Characterization: Advanced fabrication techniques such as electrospinning, 3D printing, or layer-by-layer assembly could be used to create these composite materials. Characterization would involve not only traditional electrocatalysis evaluation but also the study of polymer behavior under various conditions.*

*Computational Modeling: Utilizing advanced computational models to predict the behavior of these smart electrocatalysts under different operational scenarios. This would aid in optimizing the design and composition of the polymer-catalyst system for maximum efficiency.*

**Read ref. 2 and write ideas to improve the idea from the increasing in activity to study the details.**

ChatGPT 4.0 wrote (in italics):

*To further enhance the understanding and potential applications of cobalt sulfide (CoS<sub>2</sub>) in hydrogen-evolution reaction (HER) at high overpotential, several key areas of research and development can be considered:*

- 1. Operando Spectroscopy: Employing techniques like operando X-ray absorption spectroscopy and operando Raman spectroscopy during the HER process. This approach can provide real-time insights into the dynamic changes in CoS<sub>2</sub>, including phase transitions and surface interactions.*
- 2. Nanostructuring: Developing nanostructured forms of CoS<sub>2</sub>, such as nanowires or nanoparticles, which can offer higher surface area and potentially more active sites for HER.*
- 3. Surface Coating: Investigating coatings or surface modifications that can enhance the stability of CoS<sub>2</sub> under HER conditions, possibly preventing or controlling the transformation to CoH<sub>y</sub>O<sub>x</sub>.*
- 4. Electrolyte Composition: Studying the impact of different electrolyte compositions on the stability and activity of CoS<sub>2</sub>. This might involve varying pH, ion concentration, and exploring different buffer systems.*
- 5. Additives and Promoters: Adding certain chemicals or compounds to the electrolyte that could enhance the stability or catalytic activity of CoS<sub>2</sub>.*
- 6. Heteroatom Doping: Introducing heteroatoms like nitrogen, sulfur, or phosphorus into the CoS<sub>2</sub> lattice to modify its electronic properties and catalytic behavior.*
- 7. Alloying with Other Metals: Creating alloys of CoS<sub>2</sub> with other transition metals to investigate if synergistic effects can lead to improved performance.*
- 8. Density Functional Theory (DFT): Utilizing DFT calculations to understand the electronic structure and reaction mechanisms at the molecular level. This can aid in predicting the behavior of CoS<sub>2</sub> under various conditions.*
- 9. Molecular Dynamics Simulations: To understand the structural dynamics of CoS<sub>2</sub> during the HER process and how this affects its catalytic properties.*
- 10. Accelerated Stress Testing: Conducting long-term stability tests under accelerated conditions to understand the degradation mechanisms of CoS<sub>2</sub>.*
- 11. Electrode Design: Designing electrodes that can maximize the exposure of CoS<sub>2</sub> to the reactants and facilitate efficient electron transfer.*
- 12. Life Cycle Assessment: Evaluating the environmental impact of using CoS<sub>2</sub> as an HER catalyst over its entire lifecycle.*
- 13. Explore the impact of light, especially specific wavelengths, on the catalytic activity of CoS<sub>2</sub>. Photon-induced electrocatalysis could possibly enhance the rate of HER by providing additional energy to the catalytic sites.*
- 14. Combine CoS<sub>2</sub> with other materials, such as graphene or conductive polymers, to create hybrid catalyst systems. These composites might offer improved electrical conductivity, stability, and catalytic performance.*

15. *Employ nanotechnology techniques to engineer the surface of CoS<sub>2</sub> particles at the molecular level. Surface modifications could involve creating specific defects or adding functional groups that might enhance catalytic activity or stability.*
16. *Conduct HER under varying environmental conditions (such as different pH levels, temperatures, or in the presence of specific impurities). This can provide insights into the robustness of CoS<sub>2</sub> as a catalyst under diverse operational scenarios.*
17. *Investigate the synergistic effects of CoS<sub>2</sub> with other transition metals or chalcogenides. Combining CoS<sub>2</sub> with other materials might lead to discovering new catalytic pathways or improving the overall efficiency of HER.*
18. *Pilot studies to scale up the CoS<sub>2</sub>-based HER process for industrial applications. This involves not just enhancing the catalyst but also optimizing other system components like the electrolyte, current density, and overall cell design.*
19. *Perform a comprehensive life cycle and sustainability analysis of CoS<sub>2</sub> production, usage, and disposal. This includes assessing the environmental impact of sourcing cobalt, manufacturing the catalyst, and its end-of-life treatment.*

**Read ref. 3 and write ideas to improve the idea from the increasing in activity to study the details.**

*ChatGPT 4.0 wrote (in italics):*

1. *Kinetic Isotope Effect: Performing experiments using deuterated cyclohexene could help understand the rate-determining step and the involvement of hydrogen atoms in the oxidation process.*
2. *Intermediate Tracking: Using spectroscopic methods to track the formation and consumption of intermediate species during the reaction to better understand the catalytic cycle and identify the active species.*
3. *Density Functional Theory (DFT) Calculations: Employing DFT to model the potential energy surface of the reaction mechanism, including the formation and decomposition of the manganese complex.*
4. *Molecular Dynamics Simulations: To understand how the structure of the catalyst and its decomposition products change during the reaction.*
5. *Ligand Modification: Altering the ligand environment around the manganese center to stabilize the complex and prevent decomposition, thereby enhancing the catalyst's lifetime and efficiency.*
6. *Support Interaction Studies: Investigating the interaction between the manganese complex and the SBA-15 support to understand how this affects the stability and activity of the catalyst.*
7. *In Situ/Operando Spectroscopy: Employing techniques such as X-ray absorption spectroscopy (XAS), Raman, and EPR during the reaction to gain insights into the changes in oxidation states and the environment of the manganese center.*
8. *High-Resolution Electron Microscopy: Using HRTEM to visualize changes in the catalyst structure at the nanoscale during the reaction.*
9. *Isolation and Characterization: Attempting to isolate and characterize the decomposition products of the manganese complex to identify potential catalytically active species.*
10. *Reactivity Tests: Testing the isolated decomposition products as catalysts in the oxidation of cyclohexene to confirm their catalytic activity.*
11. *Effect of Solvent and Temperature: Studying the influence of different solvents and temperatures on the stability of the catalyst and the efficiency of the oxidation reaction.*
12. *Oxidant Variability: Exploring the use of different oxidants to determine their impact on the catalyst's performance and stability.*
13. *Life Cycle Analysis: Evaluating the environmental impact of the catalytic process from the synthesis of the catalyst to its disposal.*
14. *Scalability and Practical Application: Assessing the scalability of the catalytic system for industrial applications and its economic feasibility.*

*there are routine idea could you think and say really new ideas*

*Single-Molecule Catalysis Studies:*

*Employ single-molecule techniques like scanning tunneling microscopy (STM) or atomic force microscopy (AFM) to observe the behavior of individual manganese(III) complex molecules during the catalytic process. This could reveal heterogeneity in catalytic activity and decomposition at the single-molecule level.*

*Machine Learning-Assisted Catalyst Design:*

*Utilize machine learning algorithms to analyze large datasets of catalytic performances and predict optimal catalyst structures or compositions. This approach could identify novel catalyst designs that traditional methods might overlook.*

*Quantum Computing for Reaction Pathway Analysis:*

*Leverage quantum computing to simulate complex reaction mechanisms that are computationally intensive for conventional methods. This can provide a deeper understanding of the electronic structure and dynamic behavior of the catalyst and its decomposition products.*

*Catalyst Encapsulation:*

*Experiment with encapsulating the manganese(III) complex in nanocontainers like dendrimers or metal-organic frameworks (MOFs) to control its release and improve its stability and recyclability.*

*Use of Alternative Green Oxidants:*

*Explore the use of environmentally benign oxidants, like molecular oxygen in combination with photocatalysts, to drive the oxidation reaction under milder and greener conditions.*

*Dynamic Light Scattering for Particle Analysis:*

*Implement dynamic light scattering to monitor the size and distribution of catalyst particles in real-time during the reaction, providing insights into the degradation or aggregation of the catalyst.*

*Investigate photochemical activation of the manganese(III) complex to enhance its catalytic activity and selectivity. This could involve studying the reaction under various light conditions and wavelengths.*

*Use electrochemical methods to probe the redox behavior of the manganese(III) complex during the reaction, potentially revealing how electron transfer processes are involved in its catalytic activity and decomposition.*

*Employ isotopic labeling (e.g., with deuterium) followed by mass spectrometry to trace the fate of individual atoms in the catalyst and the reactants throughout the reaction.*

*Utilize microfluidic reactors to conduct the oxidation reaction, allowing precise control over reaction conditions and enabling in situ analysis using spectroscopic methods.*

*These innovative approaches could provide groundbreaking insights into the catalytic behavior of the manganese(III) complex and its decomposition products, paving the way for the development of more effective and sustainable catalytic processes.*

## References

1. N. Akbari, S. Nandy, K. H. Chae, and M. M. Najafpour, *ACS Appl. Energy Mater.* 2023, **22**, 11613-11625.
2. S. Madadkhani, S. Nandy, K. Hwa Chae, P. Aleshkevych and M. M. Najafpour, *ACS Appl. Energy Mater.*, DOI: [10.1021/acsaem.3c02390](https://doi.org/10.1021/acsaem.3c02390)
3. Z. Zand, Y. Mousazade, R. Lacdao Arevalo, R. Bagheri, M. R. Mohammadi, R. Bikas, P. Chernev, P. Aleshkevych, M. Vandichel, Z. Song, H. Dau, M. M. Najafpour, *Communications Chemistry*, 2013, **6**, 94.
